# Supplementary material
Source: publisher figshare collection journal article supplement (https://acs.figshare.com/ndownloader/files/4029037)

# checkCIF/PLATON report

You have not supplied any structure factors. As a result the full set of tests cannot be run.

No syntax errors found.      CIF dictionary      Interpreting this report

## Datablock: I

---

|                        |                              |                           |              |
|------------------------|------------------------------|---------------------------|--------------|
| Bond precision:        | C-C = 0.0184 Å               | Wavelength=0.71073        |              |
| Cell:                  | a=21.6328(9)                 | b=21.6328(9)              | c=21.6328(9) |
|                        | alpha=90                     | beta=90                   | gamma=90     |
| Temperature:           | 296 K                        |                           |              |
|                        | Calculated                   | Reported                  |              |
| Volume                 | 10123.7(13)                  | 10123.7(7)                |              |
| Space group            | P 21 3                       | P2(1)3                    |              |
| Hall group             | P 2ac 2ab 3                  | ?                         |              |
| Moiety formula         | C72 H60 Cu3 N18, B O40 W12 ? |                           |              |
| Sum formula            | C72 H60 B Cu3 N18 O40 W12    | C72 H72 B Cu3 N18 O45 W12 |              |
| Mr                     | 4224.92                      | 4317.11                   |              |
| Dx, g cm <sup>-3</sup> | 2.772                        | 2.832                     |              |
| Z                      | 4                            | 4                         |              |
| Mu (mm <sup>-1</sup> ) | 14.274                       | 14.281                    |              |
| F000                   | 7672.0                       | 7880.0                    |              |
| F000'                  | 7642.84                      |                           |              |
| h,k,lmax               | 25,25,25                     | 25,25,25                  |              |
| Nref                   | 3246[ 5984]                  | 5991                      |              |
| Tmin,Tmax              | 0.030,0.037                  | 0.113,0.138               |              |
| Tmin'                  | 0.015                        |                           |              |

Correction method= MULTI-SCAN

Data completeness= 1.85/1.00      Theta(max)= 25.040

R(reflections)= 0.0415( 4737)      wR2(reflections)= 0.0844( 5991)

S = 0.953      Npar= 388

---

The following ALERTS were generated. Each ALERT has the format

**test-name\_ALERT\_alert-type\_alert-level.**

Click on the hyperlinks for more details of the test.

---

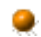

### Alert level B

PLAT201\_ALERT\_2\_B Isotropic non-H Atoms in Main Residue(s) .....

1

---

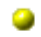

### Alert level C

CHEMW03\_ALERT\_2\_C The ratio of given/expected molecular weight as  
calculated from the \_atom\_site\* data lies outside  
the range 0.99 <> 1.01

From the CIF: \_cell\_formula\_units\_Z 4

From the CIF: \_chemical\_formula\_weight 4317.11

TEST: Calculate formula weight from \_atom\_site\_\*

| atom | mass   | num   | sum     |
|------|--------|-------|---------|
| C    | 12.01  | 72.00 | 864.79  |
| H    | 1.01   | 60.00 | 60.48   |
| N    | 14.01  | 18.00 | 252.13  |
| O    | 16.00  | 40.00 | 639.96  |
| B    | 10.81  | 1.00  | 10.81   |
| W    | 183.85 | 12.00 | 2206.20 |
| Cu   | 63.55  | 3.00  | 190.64  |

Calculated formula weight 4225.01

PLAT041\_ALERT\_1\_C Calc. and Reported SumFormula Strings Differ ?

PLAT043\_ALERT\_1\_C Check Reported Molecular Weight ..... 4317.11

PLAT044\_ALERT\_1\_C Calculated and Reported Dx Differ ..... ?

PLAT048\_ALERT\_1\_C MoietyFormula Not Given ..... ?

PLAT068\_ALERT\_1\_C Reported F000 Differs from Calcd (or Missing)... ?

PLAT125\_ALERT\_4\_C No '\_symmetry\_space\_group\_name\_Hall' Given ..... ?

PLAT241\_ALERT\_2\_C Check High Ueq as Compared to Neighbors for C4

PLAT241\_ALERT\_2\_C Check High Ueq as Compared to Neighbors for C10

PLAT241\_ALERT\_2\_C Check High Ueq as Compared to Neighbors for C22

PLAT241\_ALERT\_2\_C Check High Ueq as Compared to Neighbors for C24

PLAT241\_ALERT\_2\_C Check High Ueq as Compared to Neighbors for O3

PLAT242\_ALERT\_2\_C Check Low Ueq as Compared to Neighbors for N4

PLAT242\_ALERT\_2\_C Check Low Ueq as Compared to Neighbors for C3

PLAT242\_ALERT\_2\_C Check Low Ueq as Compared to Neighbors for C11

PLAT242\_ALERT\_2\_C Check Low Ueq as Compared to Neighbors for C17

PLAT334\_ALERT\_2\_C Small Average Benzene C-C Dist. C17 -C22 1.36 Ang.

PLAT342\_ALERT\_3\_C Low Bond Precision on C-C Bonds ..... 0.0184 Ang

PLAT731\_ALERT\_1\_C Bond Calc 1.349(16), Rep 1.349(7) ..... 2 su-Ra

C1 -C2 1.555 1.555 # 43

PLAT731\_ALERT\_1\_C Bond Calc 1.36(2), Rep 1.359(7) ..... 3 su-Ra

N3 -C8 1.555 1.555 # 48

PLAT731\_ALERT\_1\_C Bond Calc 1.36(2), Rep 1.359(7) ..... 3 su-Ra

C5 -C6 1.555 1.555 # 51

PLAT731\_ALERT\_1\_C Bond Calc 1.36(2), Rep 1.359(7) ..... 3 su-Ra

C6 -C7 1.555 1.555 # 53

PLAT731\_ALERT\_1\_C Bond Calc 1.36(2), Rep 1.359(7) ..... 3 su-Ra

C7 -C8 1.555 1.555 # 55

PLAT731\_ALERT\_1\_C Bond Calc 1.341(19), Rep 1.341(8) ..... 2 su-Ra

C9 -C10 1.555 1.555 # 63

PLAT731\_ALERT\_1\_C Bond Calc 1.347(18), Rep 1.347(7) ..... 3 su-Ra

N6 -C16 1.555 1.555 # 68

PLAT731\_ALERT\_1\_C Bond Calc 1.35(2), Rep 1.347(7) ..... 3 su-Ra

C13 -C14 1.555 1.555 # 72

PLAT731\_ALERT\_1\_C Bond Calc 1.348(19), Rep 1.347(7) ..... 3 su-Ra

C14 -C15 1.555 1.555 # 74

PLAT731\_ALERT\_1\_C Bond Calc 1.35(2), Rep 1.347(7) ..... 3 su-Ra

C15 -C16 1.555 1.555 # 76

PLAT731\_ALERT\_1\_C Bond Calc 1.361(17), Rep 1.360(7) ..... 2 su-Ra

C18 -C19 1.555 1.555 # 82

PLAT731\_ALERT\_1\_C Bond Calc 1.361(19), Rep 1.360(7) ..... 3 su-Ra

C21 -C22 1.555 1.555 # 88

PLAT732\_ALERT\_1\_C Angle Calc 125.3(9), Rep 125.3(3) ..... 3.00 su-Ra

B1 -O2 -W1 1.555 1.555 1.555 # 68

```

FORMU01_ALERT_2_G There is a discrepancy between the atom counts in the
    _chemical_formula_sum and the formula from the _atom_site* data.
    Atom count from _chemical_formula_sum: C72 H72 B1 Cu3 N18 O45 W12
    Atom count from the _atom_site data:  C72 H60 B1 Cu3 N18 O40 W12
CELLZ01_ALERT_1_G Difference between formula and atom_site contents detected.
CELLZ01_ALERT_1_G ALERT: Large difference may be due to a
    symmetry error - see SYMMG tests
    From the CIF: _cell_formula_units_Z      4
    From the CIF: _chemical_formula_sum  C72 H72 B Cu3 N18 O45 W12
    TEST: Compare cell contents of formula and atom_site data

    atom      Z*formula  cif sites diff
    C          288.00    288.00    0.00
    H          288.00    240.00    48.00
    B           4.00     4.00     0.00
    Cu         12.00    12.00     0.00
    N          72.00    72.00     0.00
    O         180.00    160.00    20.00
    W          48.00    48.00     0.00
REFLT03_ALERT_4_G Please check that the estimate of the number of Friedel pairs is
    correct. If it is not, please give the correct count in the
    _publ_section_exptl_refinement section of the submitted CIF.
    From the CIF: _diffrn_reflns_theta_max      25.04
    From the CIF: _reflns_number_total          5991
    Count of symmetry unique reflns             3246
    Completeness (_total/calc)                   184.57%
    TEST3: Check Friedels for noncentro structure
    Estimate of Friedel pairs measured           2745
    Fraction of Friedel pairs measured           0.846
    Are heavy atom types Z>Si present           yes
PLAT002_ALERT_2_G Number of Distance or Angle Restraints on AtSite              10
PLAT003_ALERT_2_G Number of Uiso or Uij Restrained Atom Sites ....              29
PLAT005_ALERT_5_G No _iucr_refine_instructions_details in CIF ....              ?
PLAT152_ALERT_1_G The Supplied and Calc. Volume s.u. Differ by ...              6 Units
PLAT605_ALERT_4_G Structure Contains Solvent Accessible VOIDS of .              301 A**3
PLAT764_ALERT_4_G Overcomplete CIF Bond List Detected (Rep/Expd) .              1.16 Ratio
PLAT860_ALERT_3_G Note: Number of Least-Squares Restraints .....              254
PLAT869_ALERT_4_G ALERTS Related to the use of SQUEEZE Suppressed                !

```

- 
- 0 **ALERT level A** = Most likely a serious problem - resolve or explain  
 1 **ALERT level B** = A potentially serious problem, consider carefully  
 31 **ALERT level C** = Check. Ensure it is not caused by an omission or oversight  
 12 **ALERT level G** = General information/check it is not something unexpected
- 21 ALERT type 1 CIF construction/syntax error, inconsistent or missing data  
 15 ALERT type 2 Indicator that the structure model may be wrong or deficient  
 2 ALERT type 3 Indicator that the structure quality may be low  
 5 ALERT type 4 Improvement, methodology, query or suggestion  
 1 ALERT type 5 Informative message, check
- 

## checkCIF publication errors

---

### Alert level A

PUBL004\_ALERT\_1\_A The contact author's name and address are missing,  
 \_publ\_contact\_author\_name and \_publ\_contact\_author\_address.  
 PUBL005\_ALERT\_1\_A \_publ\_contact\_author\_email, \_publ\_contact\_author\_fax and  
 \_publ\_contact\_author\_phone are all missing.

At least one of these should be present.  
PUBL006\_ALERT\_1\_A \_publ\_requested\_journal is missing  
e.g. 'Acta Crystallographica Section C'  
PUBL008\_ALERT\_1\_A \_publ\_section\_title is missing. Title of paper.  
PUBL009\_ALERT\_1\_A \_publ\_author\_name is missing. List of author(s) name(s).  
PUBL010\_ALERT\_1\_A \_publ\_author\_address is missing. Author(s) address(es).  
PUBL012\_ALERT\_1\_A \_publ\_section\_abstract is missing.  
Abstract of paper in English.

---

### Alert level G

PUBL013\_ALERT\_1\_G The \_publ\_section\_comment (discussion of study) is missing. This is required for a full paper submission (but is optional for an electronic paper).  
PUBL017\_ALERT\_1\_G The \_publ\_section\_references section is missing or empty.

---

7 **ALERT level A** = Data missing that is essential or data in wrong format  
2 **ALERT level G** = General alerts. Data that may be required is missing

---

## Publication of your CIF

You should attempt to resolve as many as possible of the alerts in all categories. Often the minor alerts point to easily fixed oversights, errors and omissions in your CIF or refinement strategy, so attention to these fine details can be worthwhile. In order to resolve some of the more serious problems it may be necessary to carry out additional measurements or structure refinements. However, the nature of your study may justify the reported deviations from journal submission requirements and the more serious of these should be commented upon in the discussion or experimental section of a paper or in the "special\_details" fields of the CIF. *checkCIF* was carefully designed to identify outliers and unusual parameters, but every test has its limitations and alerts that are not important in a particular case may appear. Conversely, the absence of alerts does not guarantee there are no aspects of the results needing attention. It is up to the individual to critically assess their own results and, if necessary, seek expert advice.

If level A alerts remain, which you believe to be justified deviations, and you intend to submit this CIF for publication in Acta Crystallographica Section C or Section E, you should additionally insert an explanation in your CIF using the Validation Reply Form (VRF) below. Your explanation will be considered as part of the review process.

If you intend to submit to another section of Acta Crystallographica or Journal of Applied Crystallography or Journal of Synchrotron Radiation, you should make sure that at least a basic structural check is run on the final version of your CIF prior to submission.

```
# start Validation Reply Form
_vrf_PUBL004_GLOBAL
;
PROBLEM: The contact author's name and address are missing,
RESPONSE: ...
;
_vrf_PUBL005_GLOBAL
;
PROBLEM: _publ_contact_author_email, _publ_contact_author_fax and
RESPONSE: ...
;
```

```

_vrf_PUBL006_GLOBAL
;
PROBLEM: _publ_requested_journal is missing
RESPONSE: ...
;
_vrf_PUBL008_GLOBAL
;
PROBLEM: _publ_section_title is missing. Title of paper.
RESPONSE: ...
;
_vrf_PUBL009_GLOBAL
;
PROBLEM: _publ_author_name is missing. List of author(s) name(s).
RESPONSE: ...
;
_vrf_PUBL010_GLOBAL
;
PROBLEM: _publ_author_address is missing. Author(s) address(es).
RESPONSE: ...
;
_vrf_PUBL012_GLOBAL
;
PROBLEM: _publ_section_abstract is missing.
RESPONSE: ...
;
# end Validation Reply Form

```

If you wish to submit your CIF for publication in Acta Crystallographica Section C or E, you should upload your CIF via the web. If your CIF is to form part of a submission to another IUCr journal, you will be asked, either during electronic submission or by the Co-editor handling your paper, to upload your CIF via our web site.

---

**PLATON version of 18/07/2011; check.def file version of 04/07/2011**

```

Prob = 50
Temp = 296

```

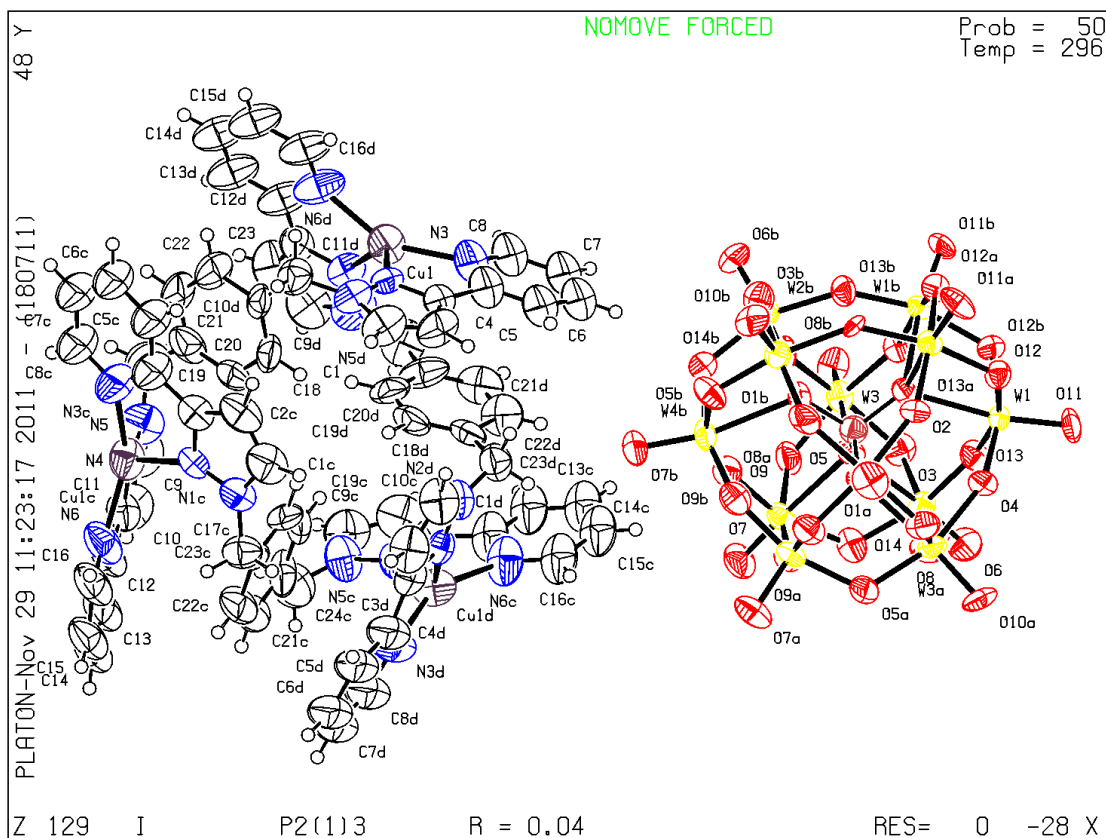

Supplement: Supplementary file 1 [file 4029037]
